# Supplementary material for: A post-GWAS confirming the genetic effects and functional polymorphisms of AGPAT3 gene on milk fatty acids in dairy cattle
Source: J Anim Sci Biotechnol. 2021 Feb 1;12:24. doi: 10.1186/s40104-020-00540-4 (PMC7849138; doi:10.1186/s40104-020-00540-4)
Supplement: Supplementary file 1 — Additional file 1: Table S1. PCR primers information of AGPAT3 gene [file 40104_2020_540_MOESM1_ESM.xlsx]

## Sheet: Sheet1
Table S1 PCR primers information of AGPAT3 gene
Primer	Location	Primer sequences (5'-3')	Product size (bp)	Annealing Temp (℃）
AGPAT3-1	5' flanking region	F-GTGACTGTCCACAGCAGGTG	792**	60
		R-CCTCGTTTTCCTCAAATCCA
AGPAT3-2	5' flanking region	F-GCTGCTGTCCTTGAAACTCC	749**	60
		R-TGCAGACTTTTCCTCCATGA
AGPAT3-3	exon 1	F-AAAGGGCAGACCATTGTCAC	706**	60
		R-ATGCAGGAAGAGGCAACTGT
AGPAT3-4	exon 2	F-ACAGTTGCCTCTTCCTGCAT	401	60
		R-AGGGGACACAAGTCACAAGC
AGPAT3-5	exon 3	F-ACTAGGTTCCTGGGGGTCAC	623	60
		R-GCTGAGCACCGCATACATT
AGPAT3-6	exon 4	F-CACACACACCATCGAAACTCA	505	60
		R-GCAGTCCCAGAACCCATGT
AGPAT3-7	exon 5	F-ACCTAGTGGCACCCACACTC	569**	60
		R-CTCCGCTAACATTCCAGAGG
AGPAT3-8	exon 6	F-GGGAGATTTTGCTTTCCACA	491**	60
		R-CACGTAAACCCACGAACTCA
AGPAT3-9	exon 8	F-GACACTGCTCGAGGGAAAGT	456**	60
		R-GCACATCACGCCTGTCTCTA
AGPAT3-10	exon 10	F-CGACTTTTCCAGGTTGATGG	736**	60
		R-AACGGATTCAAGGTGTCAGC
AGPAT3-11	3' flanking region	F-CAGGGGAGTCCCTAGTGTCC	721	60
		R-CACACACACACAGGTGAGCA
AGPAT3-12	3' flanking region	F-GGCACTGAGACAGTGTGGAA	716	60
		R-GTGGTGACCAGGAGGACTGT
AGPAT3-13	3' flanking region	F-GAGGGGTGGATCTTGCTTTT	737**	60
		R-GACCAGGGTCACTTCTTTGG
AGPAT3-14	3' flanking region	F-ACGGTGGCCGTGTGATAG	408**	60
		R-CAGCGGCTGAGTTAGAGTGA
Note: **: SNPs are detected
