# Supplementary material for: A post-GWAS confirming the genetic effects and functional polymorphisms of AGPAT3 gene on milk fatty acids in dairy cattle
Source: J Anim Sci Biotechnol. 2021 Feb 1;12:24. doi: 10.1186/s40104-020-00540-4 (PMC7849138; doi:10.1186/s40104-020-00540-4)
Supplement: Supplementary file 2 — Additional file 2: Table S2. Additive (a), dominant (d) and allele substitution (α) effects of 17 SNPs on milk fatty acid traits of AGPAT3 gene in Chinese Holstein cows [file 40104_2020_540_MOESM2_ESM.xlsx]

## Sheet: Sheet1
Table S2 Additive(a), dominant(d) and allele substitution(α) effects of 17 SNPs on milk fatty acid traits of AGPAT3 gene in Chinese Holstein cows
SNP	Genotype	C6:0	C8:0	C10:0	C11:0	C12:0	C13:0	C14:0	C14:1	C15:0	C16:0	C16:1	C17:0
rs210638665	a	0.0307**	0.0016	-0.0014	-0.0001	-0.0005	-0.0004	-0.129**	-0.0033	-0.0015	-0.0316	0.0201	-0.0011
	d	-0.1269**	-0.0742**	-0.0354	-0.0001	-0.0047	0.0022	0.0079	-0.0223	-0.0044	0.05	-0.0112	0.0051
	α	0.0897**	0.0362**	0.0148	-0.0001	0.0017	-0.0014	-0.1326	0.0071	0.0005	-0.0549	0.0253	-0.0034
rs209442459	a	-0.0451**	-0.0352**	-0.0214	0.0003	-0.0016	0.0011	-0.0547*	-0.012	-0.0026	-0.0121	0.0067	0.0027
	d	0.109**	0.0186	-0.0194	-0.0005	-0.0189	-0.0019	-0.1747	0.0035	-0.0045	0.0011	0.0367	-0.0026
	α	0.0057	-0.0265**	-0.0303	0	-0.0102	0.0002	-0.1346**	-0.0104	-0.0047	-0.0116	0.0237	0.0015
rs110551271	a	-0.0494**	-0.0468**	-0.0417**	-0.0005	-0.0137	0.0001	-0.0327	-0.0142	-0.0015	-0.0309	0.0031	0.0038**
	d	0.0933**	0.0188	0.0121	-0.0001	0.0123	-0.0016	-0.0325	0.0129	-0.0015	-0.1602	0.0355	-0.0022
	α	-0.0112	-0.039**	-0.0368	-0.0005	-0.0086	-0.0006	-0.0459	-0.0089	-0.0021	-0.0971	0.0177	0.003
rs110278717	a	-0.0364**	-0.0245**	-0.018	0	-0.0085	-0.0013	0.0223	-0.0017	-0.0091	-0.0236	-0.0279	-0.0009
	d	-0.0141	-0.0367**	-0.061*	-0.0017	-0.0062	-0.0021	-0.048	-0.0156	-0.0032	0.1395	0.0047	0.0044
	α	-0.0415**	-0.0375**	-0.04*	-0.0006	-0.0108	-0.0021	0.005	-0.0073	-0.0102	0.0264	-0.0262	0.0007
rs43281404	a	-0.0837**	-0.04*	-0.0019	-0.0026	-0.0125	0.0043	-0.2883*	-0.0085	-0.0036	0.1499	-0.0336	0.0079
	d	0.1037**	0.0505*	-0.0027	0.0007	-0.0175	-0.0089	0.0063	0.0156	-0.0113	-0.2243	0.0352	-0.0077
	α	-0.1581**	-0.0763*	0.0001	-0.0032	0.0001	0.0107	-0.2929	-0.0197	0.0045	0.3117	-0.0589	0.0134
rs110897007	a	0.0126	-0.0003	-0.0135	-0.0012	-0.0158	-0.0014	0.0171	-0.0063	-0.0043	0.0834	0.0166	0.0012
	d	0.0619**	0.0551**	-0.0022	-0.0022	-0.0086	-0.0024	-0.063	0.0014	-0.0012	-0.0862	0.0556*	0.0027
	α	-0.0151*	-0.0249**	-0.0125	-0.0002	-0.012	-0.0003	0.0453	-0.0069	-0.0037	0.1217	-0.0083	0
rs378285374	a	-0.0742*	0.0228	-0.0879	-0.0061	-0.0619	0.0008	-0.1262	0.0385	0.0092	0.0004	0.0454	0.0043
	d	-0.1154**	-0.0154	-0.111	-0.0082	-0.0928	-0.0015	-0.2992	0.0345	-0.0056	-0.4316	0.0291	0.0129
	α	0.0223	0.0357**	0.0053	0.0008	0.0161	0.002	0.1249	0.0096	0.014	0.3619*	0.021	-0.0066
rs43276015	a	0.0178**	0.0054	0.0011	-0.0011	-0.0178	0.0002	-0.0644	0.0078	-0.0029	-0.0681	-0.0043	0.0005
	d	-0.1039**	-0.0859**	-0.088**	-0.0011	-0.027	0.0002	0.0649	-0.0071	-0.0057	0.0013	0.0005	0.0073*
	α	0.0267**	0.0123*	0.0084	-0.001	-0.0157	0.0002	-0.0697*	0.0084	-0.0024	-0.0682	-0.0044	-0.0001
rs379405887	a	-0.1315**	-0.0258*	-0.0403	0.0026	0.0143	0.0036	0.1145	0.0153	0.0097	0.1397	0.0174	-0.0014
	d	-0.1431**	-0.0399**	-0.0501	0.0012	-0.0502	0.0009	0.0034	0.0231	0.003	0.0576	-0.0231	-0.0039
	α	-0.0501**	-0.0031	-0.0119	0.0019	0.0427	0.0031	0.1126*	0.0022	0.008	0.1069	0.0306	0.0008
rs383583298	a	0.0615**	0.034**	0.055**	0.0005	0.019	0.0016	0.0508	-0.0002	0.0099	0.0303	-0.0068	-0.0038
	d	0.0283**	-0.0121	-0.0062	0.0001	0.0386	-0.0003	0.0883	-0.0072	0.0066	0.141	-0.0089	-0.0018
	α	0.0557**	0.0365**	0.0563**	0.0005	0.0109	0.0016	0.0325	0.0013	0.0085	0.0014	-0.005	-0.0034
rs43766238	a	-0.049**	-0.0146**	-0.0201	-0.0006	-0.0275	-0.0004	-0.0736*	0.0045	-0.0075	-0.1148	0.0041	0.0021
	d	0.0653**	0.0522**	0.0713**	0.0014	0.0305	0.0029	0.052	0.0021	0.0131	-0.019	0.0037	-0.0032
	α	-0.0624**	-0.0254**	-0.0348	-0.0008	-0.0339	-0.0009	-0.0843*	0.0041	-0.0102	-0.1109	0.0034	0.0027
rs43760756	a	-0.0603**	-0.0354**	-0.0503**	-0.0005	-0.0276	-0.0019	-0.0498	-0.0016	-0.0101	-0.0235	-0.0006	0.0036
	d	0.0335**	-0.0053	0.0108	0.0004	0.0351	-0.0003	0.0698	-0.0082	0.0053	0.144	-0.0011	-0.0025
	α	-0.0536**	-0.0365**	-0.0481**	-0.0004	-0.0205	-0.002	-0.0359	-0.0033	-0.009	0.0048	-0.0008	0.0031
rs43760757	a	0.0576**	0.034**	0.0521**	0.0007	0.0348	0.0018	0.0523	-0.0006	0.0086	0.0164	-0.0055	-0.0036
	d	0.0277**	-0.0127	-0.0133	0	0.0387	-0.0006	0.0689	-0.0123	0.0057	0.1926	-0.0123	-0.0016
	α	0.0519**	0.0366**	0.0548**	0.0007	0.0268	0.002	0.0383	0.0019	0.0075	-0.0222	-0.003	-0.0033
rs43760758	a	-0.0634**	-0.0389**	-0.0543**	-0.001	-0.0264	-0.0018	-0.0551	-0.0003	-0.0105	-0.0266	0.0001	0.0042*
	d	0.0262**	-0.0083	-0.0123	0.0003	0.0248	-0.0003	0.0923	-0.0077	0.0062	0.1243	-0.0077	-0.0034
	α	-0.058**	-0.0406**	-0.0569**	-0.001	-0.0213	-0.0019	-0.0363	-0.0019	-0.0092	-0.0015	-0.0014	0.0035
rs43760759	a	-0.0527**	-0.0106	-0.0232	-0.0004	-0.0337	-0.0007	-0.0507	0.0041	-0.0076	-0.0707	0.0022	0.0029
	d	0.0749**	0.0705**	0.0746**	0.0006	0.0276	0.0033	0.0201	0.0043	0.0136	0.0166	0.0066	-0.0039
	α	-0.0678**	-0.0248**	-0.0383*	-0.0005	-0.0394	-0.0014	-0.0547	0.0033	-0.0103	-0.074	0.0008	0.0037
rs43760760	a	0.011*	0.0293**	0.027*	0.0003	-0.0025	0.0012	-0.0105	0.0075	0.0022	-0.0643	0.0015	-0.001
	d	-0.0954**	-0.0644**	-0.0594	-0.001	-0.0512	-0.0025	-0.1295	0.005	-0.0199	-0.1655	0.0108	0.0043
	α	-0.0078	0.0164**	0.0152	0.0001	-0.0128	0.0007	-0.0359	0.0085	-0.0017	-0.0964	0.0037	-0.0002
rs382304348	a	0.0821**	0.0353*	0.0305	-0.0057	-0.0019	-0.0014	0.0605	0.0003	-0.0009	0.2226	0.0087	-0.0019
	d	0.0068	-0.0056	-0.0465	0.0049	-0.0745	-0.0022	-0.1619	0.0033	-0.0031	-0.1694	-0.0378	-0.0055
	α	0.087**	0.0312**	-0.0032	-0.0021	-0.0558	-0.0029	-0.0569	0.0027	-0.0031	0.099	-0.0188	-0.0058*
SNPs	Genotype	C17:1	C18:0	C18:1cis-9	C18index	C20:0	C14index	C16index	C17index	SFA	UFA	SFA/UFA	Total index
rs210638665	a	0.0025	-0.0957	0.0749	0.3298	0.0005	0.0533	0.0561	0.3678*	-0.1629	0.1486	-0.0137	0.1797
	d	-0.0023	0.1908	0.1497	0.0432	0.0062**	-0.2198	-0.037	-0.4022	-0.0553	0.1517	-0.012	0.1462
	α	0.0035	-0.2429	0.0062	0.3099	-0.0024	0.1542	0.0732	0.5525*	-0.1375	0.0788	-0.0082	0.1123
rs209442459	a	0.0002	0.0658	0.1202*	0.189	0.0035**	-0.0687	0.0155	0.0002	-0.1297	0.1444*	-0.0135	0.1833**
	d	0.0057	-0.1808	0.0665	0.6242	-0.0012	0.1823	0.0866	0.735*	-0.2195	0.2056	-0.0152	0.1509
	α	0.0028	0.0378	0.1508	0.4766*	0.003	0.0151	0.0555	0.3382	-0.2307	0.2391	-0.0205	0.2529*
rs110551271	a	0.0007	0.1056*	0.1624**	0.0406	0.0026**	-0.0806	0.0129	-0.0109	-0.1123	0.1558*	-0.0172	0.153**
	d	0.0057	-0.1923	0.0209	0.4674	-0.0033	0.1199	0.0823	0.7038*	-0.2374	0.2557	-0.0108	0.2133
	α	0.003	0.0827	0.171	0.232	0.0013	-0.0317	0.0467	0.2768	-0.2093	0.2605*	-0.0216	0.2404*
rs110278717	a	-0.0016	-0.0392	0.0351	0.0579	0.0016	-0.0319	-0.0691	-0.4443**	-0.0021	-0.0722	-0.0048	0.0654
	d	-0.0033	0.3087**	-0.1274	-0.6732*	-0.0004	-0.1371	0.0105	-0.1594	0.1826	-0.0856	0.0131	-0.2881*
	α	-0.0028	-0.016	-0.0108	0.3003	0.0015	-0.0814	-0.0654	-0.5016**	0.0636	-0.103	-0.0001	0.1692
rs43281404	a	-0.0077	0.1122	0.4167	0.1361	0.0153**	-0.0289	-0.0908	-0.8	-0.0287	0.2109	-0.0009	0.2296
	d	0.0078	-0.0941	-0.0384	0.2152	-0.0093*	0.2589	0.1098	0.8106	-0.279	0.1064	-0.0253	0.2002
	α	-0.0133	0.2141	0.4443	-0.0188	0.022**	-0.215	-0.1697	-1.3804	0.1719	0.1344	0.0174	0.0854
rs110897007	a	-0.0043*	0.0047	-0.2221*	-0.307	-0.0046**	-0.1726	0.0326	-0.2968	0.1673	-0.171	0.0118	-0.2061
	d	-0.001	-0.0237	0.0214	0.1114	-0.0011	-0.0431	0.1424*	0.1259	-0.0733	0.1399	-0.0198	0.0815
	α	-0.0039*	0.0223	-0.2316**	-0.2573	-0.0041**	-0.1534	-0.031	-0.3531**	0.2001	-0.2334*	0.0206	-0.1698
rs378285374	a	0.0088	-0.3042	0.2787	0.9262	-0.015**	0.507	0.129	0.5179	-1.0105*	1.0863*	-0.1377*	0.7506*
	d	0.0215**	-0.0282	0.927*	1.2513	-0.0167**	0.6857	0.1259	1.3398*	-1.7591**	1.7896**	-0.2184**	1.3955**
	α	-0.0092**	-0.2687	-0.4983	1.9755	-0.0007	-0.0676	0.0234	-0.6044	0.4644*	-0.4138	0.0453	1.9196**
rs43276015	a	0.0005	0.0131	0.0643	-0.0443	0.0021*	0.1575*	-0.0112	0.0933	-0.0437	0.0535	-0.0062	0.103
	d	-0.0016	0.1101	-0.0203	-0.081	-0.0048**	-0.1302	0.0128	-0.3647	-0.1385	0.0935	-0.0145	-0.0257
	α	0.0006	-0.0223	0.0659	-0.0377	0.0025*	0.1679*	-0.0123	0.1235	-0.0323	0.0459	-0.005	0.1051
rs379405887	a	-0.0031	-0.1365	0.0705	0.4863	-0.0037	0.0456	0.0226	-0.0591	-0.0889	0.0884	-0.0198	0.144
	d	-0.0019	-0.0594	0.1187	0.1587	-0.0053	0.1601	-0.0755	-0.0249	-0.1819	0.0798	-0.0208	0.0574
	α	-0.0021	-0.0838	0.0034	0.5762	-0.0006	-0.045	0.0655	-0.0449	0.0141	0.0432	-0.008	0.1765
rs383583298	a	-0.0012	-0.0185	-0.153	-0.1709	0.0015	0.0028	-0.0195	0.0608	0.1983	-0.16	0.0199	-0.1905*
	d	-0.0073**	0.0561	-0.1846	-0.3373	-0.0013	-0.0464	-0.0416	-0.3736*	0.2453	-0.2748*	0.0277	-0.223
	α	0.0003	-0.0449	-0.1146	-0.2412	0.0017	0.0126	-0.0108	0.1394	0.1473	-0.1026	0.0141	-0.2369*
rs43766238	a	0.004**	-0.0225	0.164*	0.2766	0.0005	0.054	0.0264	0.1152	-0.2612*	0.2204*	-0.0305*	0.2107**
	d	0.0025	-0.0563	-0.1588	-0.1397	0.002	0.0797	-0.0039	0.2699	0.2158	-0.1404	0.0235	-0.2119
	α	0.0035*	0.0037	0.1967*	0.3054	0.0001	0.0374	0.0272	0.0591	-0.3055**	0.2495*	-0.0353*	0.2544**
rs43760756	a	0.0013	0.0248	0.1449	0.2621	-0.0007	-0.0154	-0.0015	-0.0989	-0.2269*	0.175	-0.025	0.2105*
	d	-0.0067**	0.0242	-0.1655	-0.2812	-0.002	-0.0947	-0.0069	-0.2828	0.2247	-0.2628*	0.0237	-0.1776
	α	-0.0001	0.0234	0.1118	0.3185	-0.0011	-0.0346	-0.0029	-0.1561	-0.182	0.1222	-0.0202	0.2461**
rs43760757	a	-0.0013	-0.0518	-0.1379	-0.178	0.0009	-0.0099	-0.0317	0.0457	0.2023	-0.1687	0.0195	-0.1975*
	d	-0.0072**	0.0346	-0.1528	-0.3297	-0.0015	-0.1206	-0.0667	-0.4045*	0.3143*	-0.2638*	0.0298	-0.2566*
	α	0.0001	-0.0678	-0.1067	-0.2454	0.0012	0.0149	-0.0181	0.1291	0.1383	-0.1147	0.0134	-0.2499**
rs43760758	a	0.0012	0.0324	0.1483	0.1825	-0.0013	-0.0132	0.0105	-0.1046	-0.2136*	0.1637	-0.0243	0.2078*
	d	-0.0078**	-0.007	-0.1385	-0.2884	-0.0019	-0.1303	-0.0426	-0.2817	0.2368	-0.2079	0.0225	-0.2045
	α	-0.0004	0.0328	0.12	0.2417	-0.0017	-0.0402	0.0018	-0.1629	-0.1653	0.121	-0.0197	0.2498**
rs43760759	a	0.0041**	-0.0048	0.1445	0.2652	0.0005	0.0387	0.0088	0.0898	-0.2279*	0.2069*	-0.0245	0.1954*
	d	0.0024	-0.0534	-0.1853	-0.2424	0.0023	0.0843	0.0116	0.2785	0.221	-0.1452	0.0265	-0.2408*
	α	0.0036*	0.0199	0.1818*	0.3141	0.0001	0.0215	0.0065	0.0331	-0.2722*	0.2363*	-0.0298	0.244**
rs43760760	a	0.0031**	-0.0366	0.0007	0.0659	0.001	0.0716	0.0096	0.2183*	-0.0144	0.0288	-0.0003	0.0156
	d	0.0053	0.0208	0.3309*	0.4523	-0.0006	0.0382	0.0607	-0.1759	-0.4607*	0.3903*	-0.0493	0.4741**
	α	0.0041**	-0.0378	0.066	0.1554	0.0009	0.0792	0.0215	0.1832	-0.1052	0.1062	-0.01	0.1094
rs382304348	a	0.0044	-0.1275	-0.567*	-0.8291	0.0026	-0.1601	-0.0075	-0.074	0.4993	-0.3778	0.0607	-0.5314*
	d	-0.0105*	0.1119	0.3876	0.3268	-0.0054	0.2566	-0.0761	-0.4392	-0.304	0.1133	-0.0342	0.2561
	α	-0.0032	-0.0881	-0.2861*	-1.0662	-0.0013	0.026	-0.0628	-0.3931*	0.2788	-0.2955*	0.0359	-0.7172
Note: *: The estimated effect differs from zero at P< 0.05, **: the estimated effect differs from zero at P< 0.01.
